# Supplementary material for: Nuclear Translocation of SRPKs Is Associated with 5-FU and Cisplatin Sensitivity in HeLa and T24 Cells
Source: PubMed Central journal article supplement (PMC8065462; doi:10.3390/cells10040759), 2021-03-30
Supplement: cells-10-00759-s001.pdf [file cells-10-00759-s001.pdf]

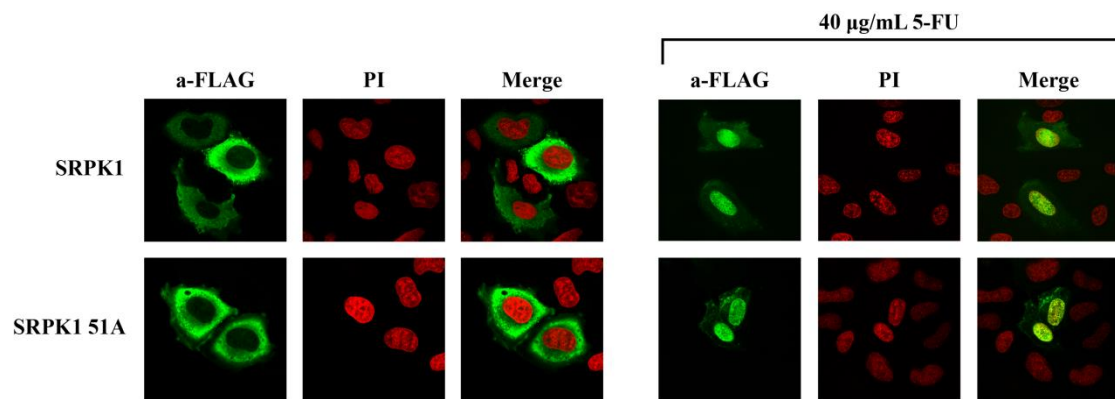

**Figure 1.** Phosphorylation of Ser51 is not responsible for the nuclear translocation of SRPK1. Fluorescent pattern of wild-type FLAG-SRPK1 and mutant FLAG-SRPK151A in 5-FU-treated HeLa cells. The concentration of 5-FU was raised to 40  $\mu\text{g}/\text{mL}$  to achieve complete nuclear translocation of FLAG-SRPK1. SRPK1 was detected using the M5 anti-FLAG monoclonal antibody, while nuclei were stained with PI. Scale bar, 10  $\mu\text{M}$ .

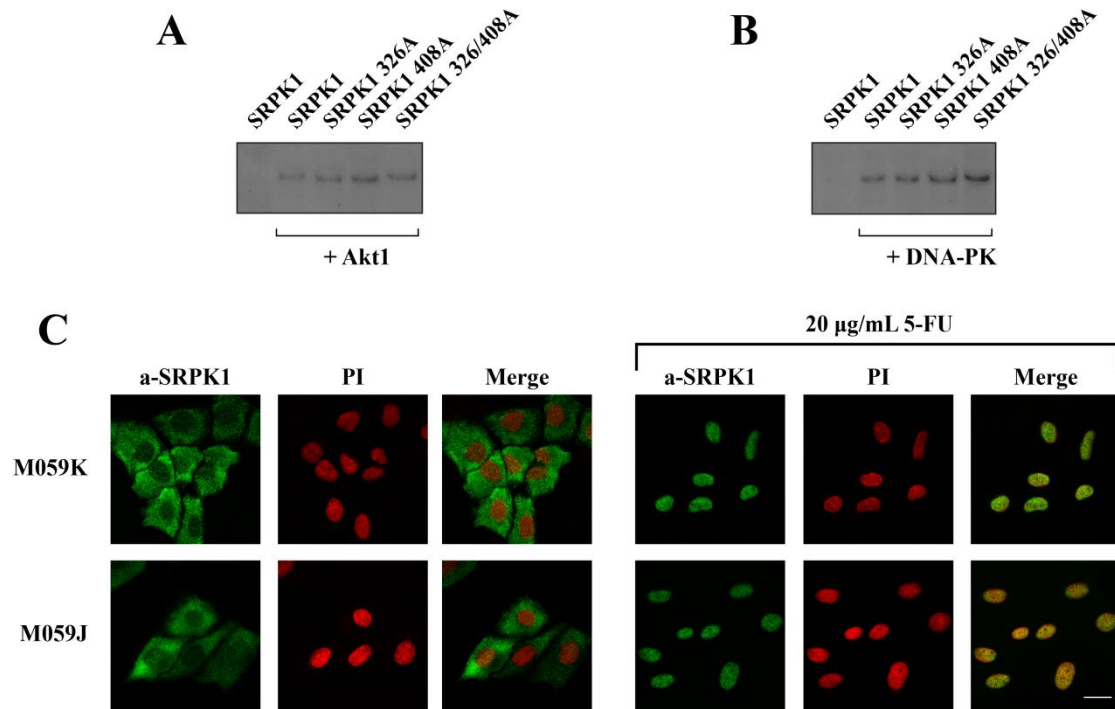

**Figure S2.** Akt and DNA-PK are not responsible for phosphorylation of Thr326 and Ser408. Phosphorylation of GST-SRPK1, GST-SRPK1326A, GST-SRPK1408A and GST-SRPK1326/408A by recombinant Akt1 (**A**) and DNA-PK (**B**). (**C**) M059K and M059J cells were treated with 20  $\mu\text{g}/\text{mL}$  5-FU for 48 h and stained for SRPK1 using the anti-SRPK1 monoclonal antibody. Nuclei were stained with PI. Scale bar, 10  $\mu\text{M}$ .
